# Supplementary material for: Unconstrained Segmental Biomechanics Applied to Gait Initiation: A Conceptual Approach
Source: Research Square preprint supplement (doi:10.21203/rs.3.rs-7749692/v1), 2025-10-01

Lugano, 19-09-2025

We hereby declare that the research presented in the manuscript entitled “Unconstrained Segmental Biomechanics Applied to Gait Initiation: A Conceptual Approach” was conducted without any financial support.

No funds, grants, or other support were received from public, commercial, or not-for-profit organizations for the development of this work.

Sincerely,


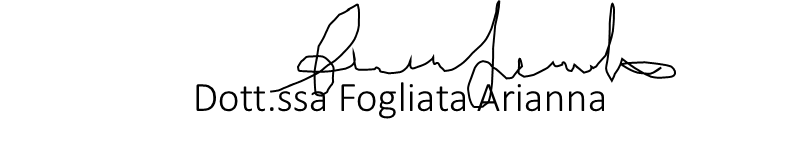

Supplement: Supplementary file 1 [file 262563b8727061611542552f.docx]
